# Supplementary material for: Anthropogenic carbon dynamics in the changing ocean
Source: Copernicus journal article supplement (doi:10.5194/os-6-605-2010), 2010-07-01
Supplement: Supplementary file 1 [file os-6-605-2010-supplement.pdf]

1 Supplemental material submitted for the paper

2

3

4 **Anthropogenic carbon dynamics in the changing ocean**

5

6 J. F. Tjiputra, K. Assmann, and C. Heinze

7

8

9 This supplemental material contains three supplemental figures.

10

11 References

12 Cavalieri, D., Parkinson, C., Gloersen, P., and Zwally H. J.: Sea ice concentra-  
13 tions from Nimbus-7 SMMR and DMSP SSM/I passive microwave data, Boul-  
14 der, Colorado USA: National Snow and Ice Data Center, Digital media, 2008.

15

16

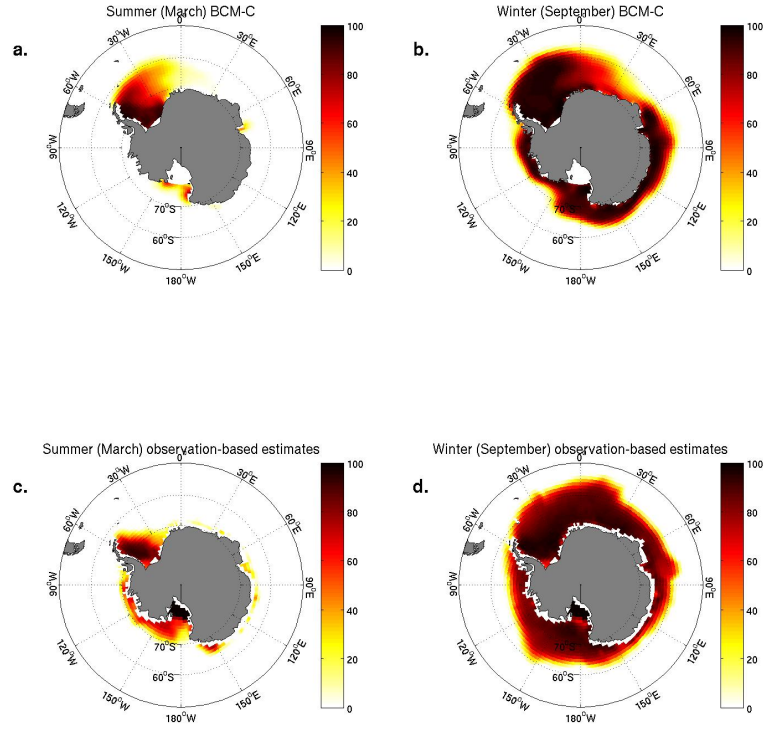

Figure 1: Model simulated (top) and observed (bottom) seasonal mean ice concentration for March (left) and September (right). Units are in [%]. The model simulations are averaged for the 1950-2000 period. The monthly climatology (1979-2007) data shown here are derived from the NASA team sea ice concentrations from nimbus-7 SMMR and DMSP SSM/I passive microwave data (Cavalieri et al., 2008).

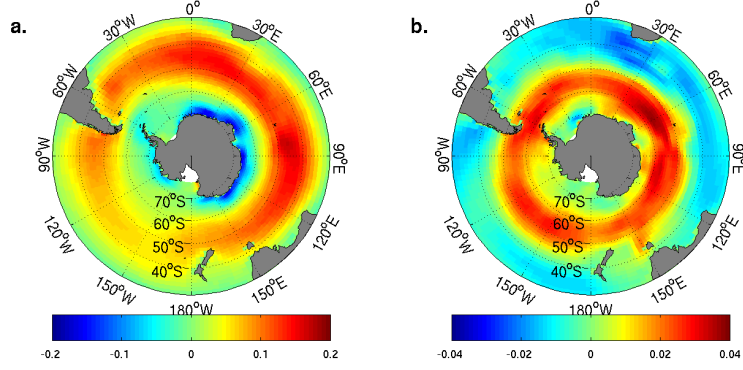

Figure 2: Simulated zonal wind stress over the Southern Ocean for the (a) early pre-industrial period (1850-1869) and the simulated mean changes toward the end of the 21st century (i.e., (2080-2099)-(1850-1869)) computed from EXP3. Units are in  $[\text{N m}^{-2}]$ .

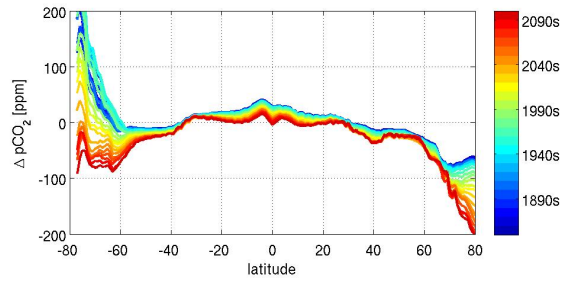

Figure 3: Latitudinal variation of the simulated  $\Delta\text{pCO}_2$  ( $\text{pCO}_2(\text{water}) - \text{pCO}_2(\text{atmosphere})$ ) between 1850 and 2100 period. Each lines represents decadal-averaged  $\Delta\text{pCO}_2$ . Units are in  $[\text{ppm}]$ .
